# Supplementary figures and images for: Rate and equilibrium effects of tert-alkyl groups on rotamerization in 3,4-alkylenedioxy-, 3-alkoxy- and 3,4-dialkoxy-2-thienyl(di-tert-alkyl)methanols: an IR, NMR, kinetics and MM studyElectronic supplementary information (ESI) available: additional experimental data. See http://www.rsc.org/suppdata/p2/b2/b203714a/
Source: Royal Society of Chemistry journal article supplement (doi:10.1039/b203714a), 2002-06-11

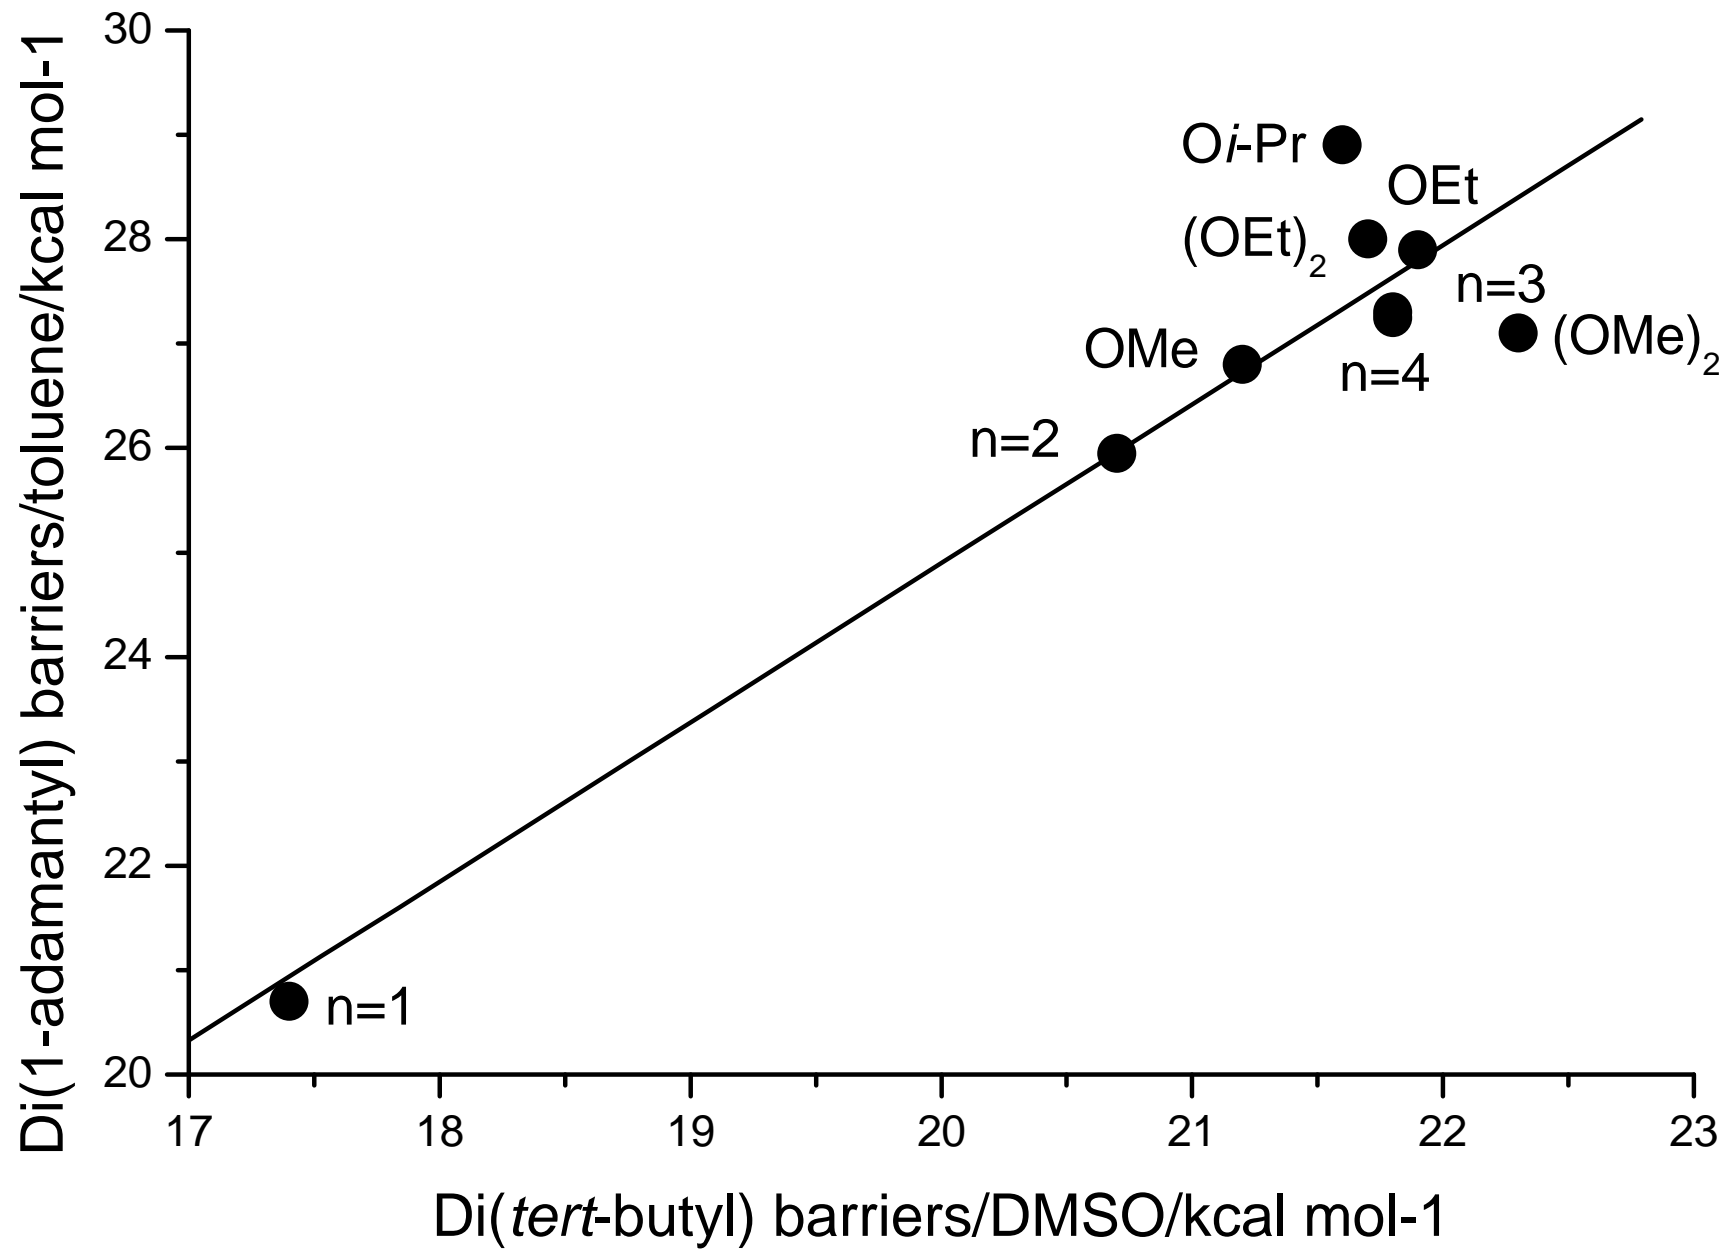

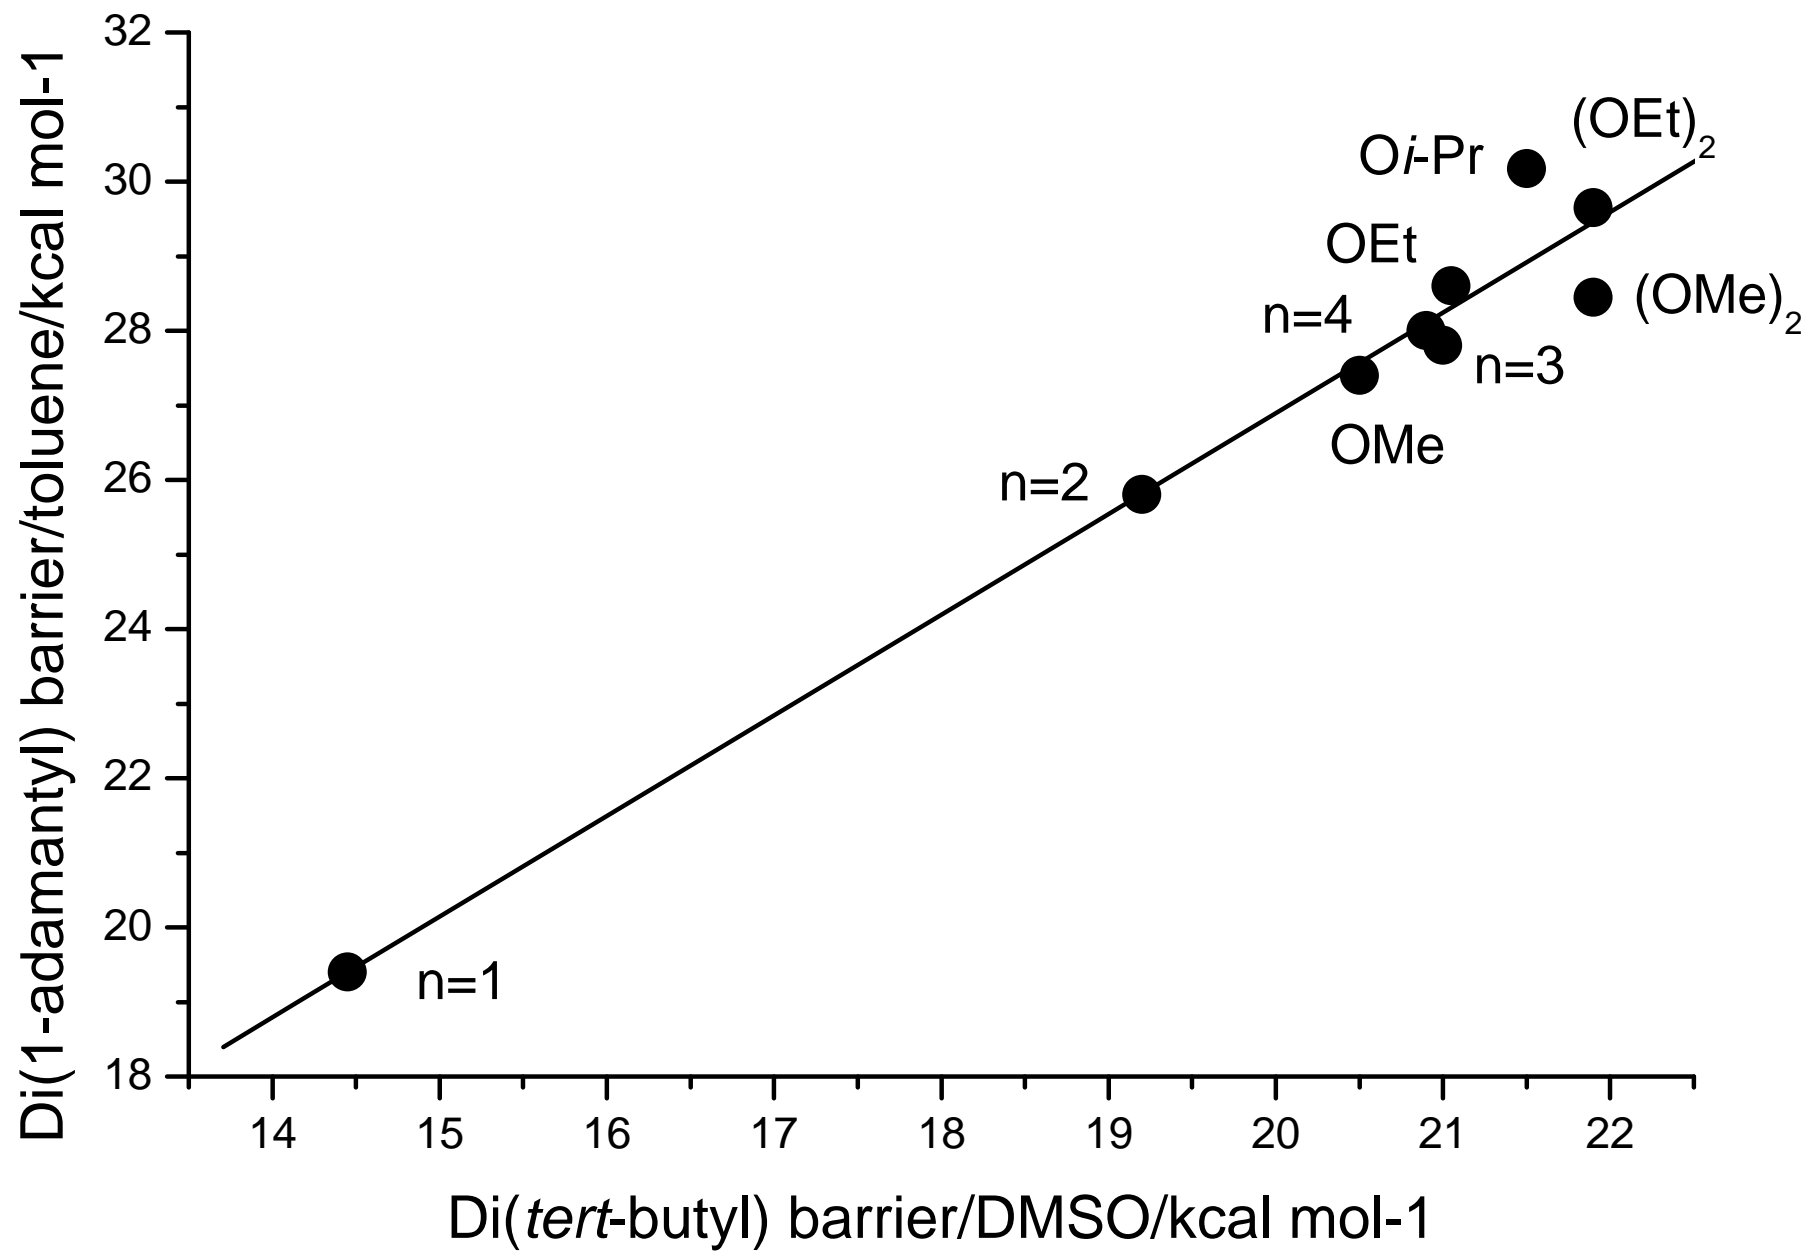

Supplement: figs1.pdf [file figs1.pdf]
